# Supplementary material for: Adsorption of gas molecules on Gd@Aun (n = 14, 15) clusters and their implication for molecule sensors
Source: Royal Society of Chemistry journal article supplement (doi:10.1039/c6ra01136e), 2016-01-01
Supplement: c6ra01136e1.pdf [file c6ra01136e1.pdf]

TABLE S1. The calculated bond lengths ( $R$ ), vibrational frequencies ( $\omega_e$ ), binding energies ( $E_b$ ), and corresponding experimental values for the ground electronic states of the Au<sub>2</sub>, CO, AuH, NO, and OH molecules.

| molecule        | method       | $R$ (Å)            | $\omega_e$ (cm <sup>-1</sup> ) | $E_b$ (eV)                |
|-----------------|--------------|--------------------|--------------------------------|---------------------------|
| Au <sub>2</sub> | In this work | 2.564              | 173                            | 2.07                      |
|                 | BP           | 2.563              | 172.9                          | 1.964                     |
|                 | PW91         | 2.561              | 174.2                          | 2.093                     |
|                 | Expt.        | 2.472 <sup>a</sup> | 191 <sup>a</sup>               | 2.29±0.02 <sup>a</sup>    |
| CO              | In this work | 1.142              | 2089.8                         | 11.969                    |
|                 | BP           | 1.142              | 2110.5                         | 11.794                    |
|                 | PW91         | 1.141              | 2117.0                         | 11.991                    |
|                 | Expt.        | 1.120 <sup>b</sup> | 2082.07 <sup>b</sup>           | 11.109±0.004 <sup>c</sup> |
| AuH             | In this work | 1.545              | 2191.4                         | 2.925                     |
|                 | BP           | 1.545              | 2324.6                         | 3.027                     |
|                 | PW91         | 1.544              | 2331.4                         | 3.087                     |
|                 | Expt.        | 1.524 <sup>b</sup> | 2305.01 <sup>b</sup>           | 3.1 <sup>b</sup>          |
| NO              | In this work | 1.164              | 1890.6                         | 7.609                     |
|                 | BP           | 1.165              | 1887.2                         | 7.396                     |
|                 | PW91         | 1.163              | 1893.7                         | 7.596                     |
|                 | Expt.        | 1.151 <sup>b</sup> | 1904.03 <sup>b</sup>           | 6.49 <sup>b</sup>         |
| OH              | In this work | 0.985              | 3631.6                         | 5.005                     |
|                 | BP           | 0.984              | 3632.7                         | 4.988                     |
|                 | PW91         | 0.984              | 3630.9                         | 5.031                     |
|                 | Expt.        | 0.971 <sup>b</sup> | 3735.21 <sup>b</sup>           | 4.39±0.22 <sup>c</sup>    |

<sup>a</sup> Taken from Ref. 36

<sup>b</sup> Taken from Ref. 37

<sup>c</sup> Taken from Ref. 38

Noting that the references are the same as in the manuscript.

TABLE S2. The ionization potential, IP (eV), of Au, C, O, and N atoms.

| Atom | Method       |        |        |        |
|------|--------------|--------|--------|--------|
|      | In this work | BP     | PW91   | Expt.  |
| Au   | 9.572        | 9.584  | 9.650  | 9.225  |
| C    | 11.610       | 11.643 | 11.685 | 11.261 |
| O    | 13.643       | 13.602 | 13.502 | 13.61  |
| N    | 14.856       | 14.903 | 14.945 | 14.533 |
